# Supplementary material for: Urinary 1H NMR Metabolomic Analysis of Prenatal Maternal Stress Due to a Natural Disaster Reveals Metabolic Risk Factors for Non-Communicable Diseases: The QF2011 Queensland Flood Study
Source: MDPI journal article supplement (doi:10.3390/metabo13040579), 2023-04-21
Supplement: s1 [file s1]

Supplemental Table 1. Pathway topology analysis of statistically significant metabolic pathways generated utilizing metabolites identified as significant by VIAVC in the comparison of high and low maternal objective hardship for both males and females, and high and low maternal composite subjective distress for females. Pathway topology analysis of maternal composite subjective distress for males is not reported as there were no metabolic pathways identified as significant (p-value less than or equal to 0.05). Pathways are displayed by order of p-value. A -Log10(p) of 1.3 or greater is equivalent to a p-value of 0.05 or less.

| Groups                               | Pathway Results                          | Raw p      | -LOG10(p) | Impact  | ID Metabolites                                                                                     |
|--------------------------------------|------------------------------------------|------------|-----------|---------|----------------------------------------------------------------------------------------------------|
| Male Objective Hardship (QFOSS)      | Taurine and hypotaurine metabolism       | 0.0051158  | 2.2911    | 0.42857 | L-Cysteine; Taurine;                                                                               |
|                                      | Pentose phosphate pathway                | 0.037427   | 1.4268    | 0.04712 | D-Ribose; D-Gluconic acid;                                                                         |
|                                      | Lysine degradation                       | 0.047378   | 1.3244    | 0.14085 | L-2-Aminoadipate; L-Hydroxylysine;                                                                 |
| Female Subjective Distress (COSMOSS) | Glycine, serine and threonine metabolism | 0.00079075 | 3.102     | 0.21707 | L-Serine; L-Cystathionine; L-Cysteine; 5-Aminolevulinate;                                          |
|                                      | Aminoacyl-tRNA biosynthesis              | 0.003291   | 2.4827    | 0.16667 | L-Cysteine; L-Serine; L-Isoleucine; L-Proline;                                                     |
|                                      | Galactose metabolism                     | 0.0050899  | 2.2933    | 0.20208 | Sucrose; Lactose; alpha-D-Galactose;                                                               |
|                                      | Cysteine and methionine metabolism       | 0.009009   | 2.0453    | 0.2963  | L-Cystathionine; L-Serine; L-Cysteine;                                                             |
|                                      | Tyrosine metabolism                      | 0.017523   | 1.7564    | 0.03714 | L-Adrenaline; Tyramine; Homovanillate;                                                             |
|                                      | Pantothenate and CoA biosynthesis        | 0.02603    | 1.5845    | 0.00714 | Pantothenate; L-Cysteine;                                                                          |
| Female Objective Hardship (QFOSS)    | Aminoacyl-tRNA biosynthesis              | 1.22E-06   | 5.9132    | 0.16667 | L-Phenylalanine; L-Glutamine; L-Cysteine; Glycine; L-Serine; L-Isoleucine; L-Proline; L-Glutamate; |
|                                      | Glycine, serine and threonine metabolism | 0.00026396 | 3.5785    | 0.55577 | L-Serine; Glycine; Sarcosine; L-Cysteine; 5-Aminolevulinate;                                       |
|                                      | Glyoxylate and dicarboxylate metabolism  | 0.0024763  | 2.6062    | 0.14815 | L-Serine; Glycine; L-Glutamate; L-Glutamine;                                                       |
|                                      | Starch and sucrose metabolism            | 0.0039813  | 2.4       | 0.13303 | Sucrose; UDP-glucose; Maltose;                                                                     |
|                                      | Nitrogen metabolism                      | 0.0048415  | 2.315     | 0       | L-Glutamate; L-Glutamine                                                                           |
|                                      | D-Glutamine and D-glutamate metabolism   | 0.0048415  | 2.315     | 0.5     | L-Glutamate; L-Glutamine                                                                           |
|                                      | Ascorbate and aldarate metabolism        | 0.0088294  | 2.0541    | 0.5     | UDP-glucose; D-Glucuronate;                                                                        |
|                                      | Galactose metabolism                     | 0.012742   | 1.8948    | 0.15148 | Sucrose; Lactose; UDP-glucose;                                                                     |
|                                      | Glutathione metabolism                   | 0.014093   | 1.851     | 0.11182 | Glycine; L-Glutamate; L-Cysteine;                                                                  |
|                                      | Porphyrin and chlorophyll metabolism     | 0.017032   | 1.7687    | 0.02799 | Glycine; 5-Aminolevulinate; L-Glutamate;                                                           |
|                                      | Arginine biosynthesis                    | 0.026767   | 1.5724    | 0.11675 | L-Glutamate; L-Glutamine;                                                                          |
|                                      | Arginine and proline metabolism          | 0.032014   | 1.4947    | 0.22479 | Hydroxyproline; L-Proline; L-Glutamate;                                                            |
|                                      | Pentose and glucuronate interconversions | 0.042975   | 1.3668    | 0.20312 | UDP-glucose; D-Glucuronate;                                                                        |
